# Supplementary material
Source: MDPI journal article supplement (https://www.mdpi.com/2079-6412/10/12/1168)
Supplement: s1 [file s1]

# Supplementary Materials: Influence of substrate temperatures and oxygen partial pressures on the crystal structure, morphology and luminescence properties of pulsed laser deposited $\text{Bi}_2\text{O}_3\text{:Ho}^{3+}$ thin films

Divya Janardhana <sup>1,2</sup>, Shivaramu N. Jayaramu <sup>1</sup>, Wiets D. Roos <sup>1</sup>, Walter Purcell <sup>2</sup> and Hendrik C. Swart <sup>1,\*</sup>

<sup>1</sup> Department of Physics, University of the Free State, Bloemfontein ZA-9300, South Africa; divyajjanardhan03@gmail.com (D.J.); nj.shivaram@gmail.com (S.N.J.); rooswd@ufs.ac.za (W.D.R.)

<sup>2</sup> Department of Chemistry, University of the Free State, Bloemfontein ZA-9300, South Africa; PurcellW@ufs.ac.za

\* Correspondence: swarthc@ufs.ac.za

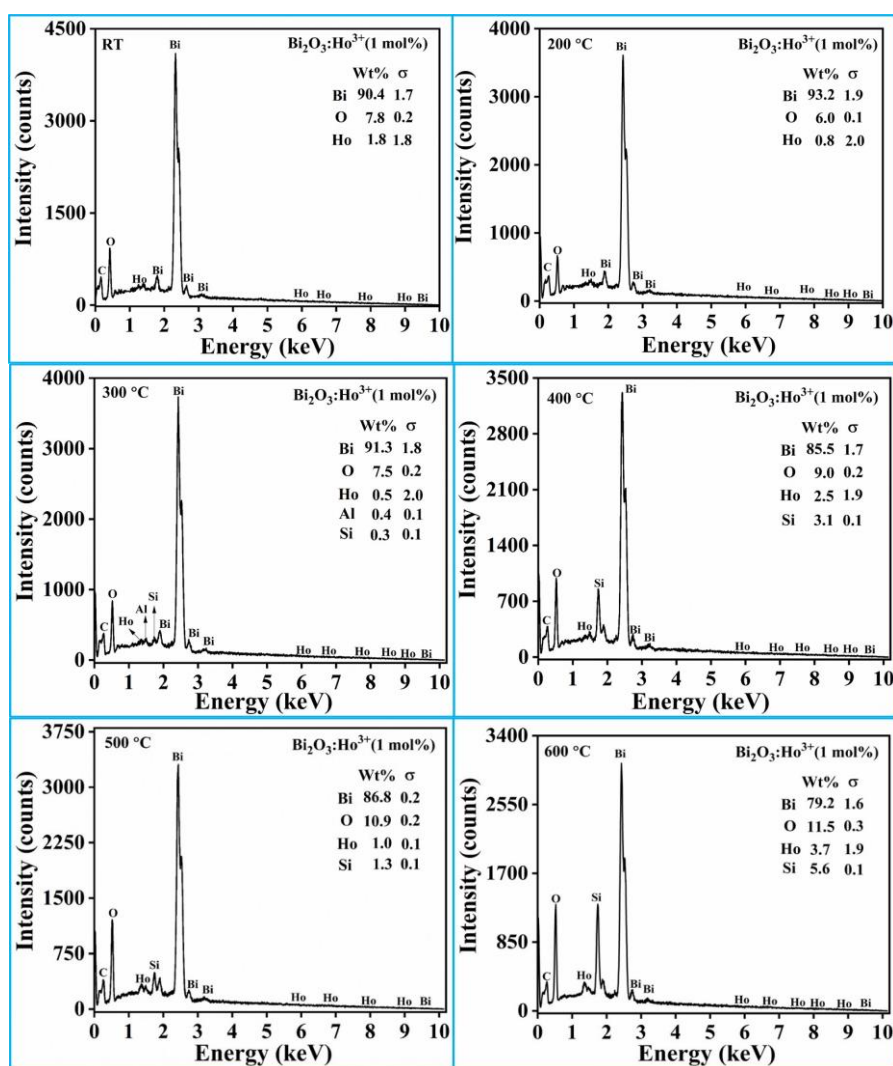

**Figure S1.** EDS of  $\text{Bi}_2\text{O}_3\text{:Ho}^{3+}$  (1 mol.%) deposited at different substrate temperatures (RT–600 °C) in vacuum.

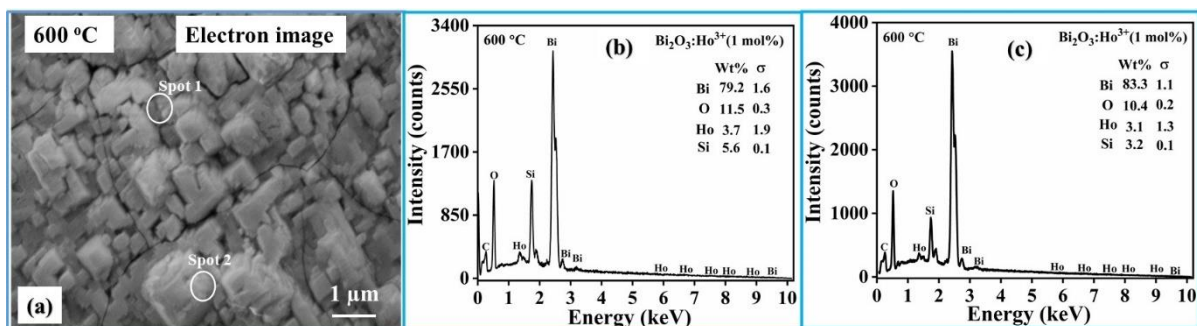

**Figure S2.** FESEM image (a) EDS taken at spot 1 (b) and spot 2 (c) of  $\text{Bi}_2\text{O}_3:\text{Ho}^{3+}$  (1 mol.%) deposited at  $T_s = 600^\circ\text{C}$ .

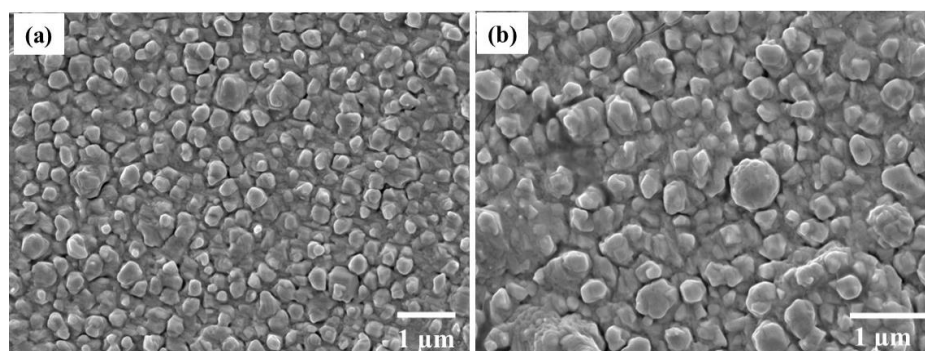

**Figure S3.** FESEM images of the sample deposited with  $\text{O}_2$  partial pressure of 200 mT ( $T_s = 400^\circ\text{C}$ ) with different magnifications as indicated by the scale bars in (a) and (b) of the  $\text{Bi}_2\text{O}_3:\text{Ho}^{3+}$  thin film.

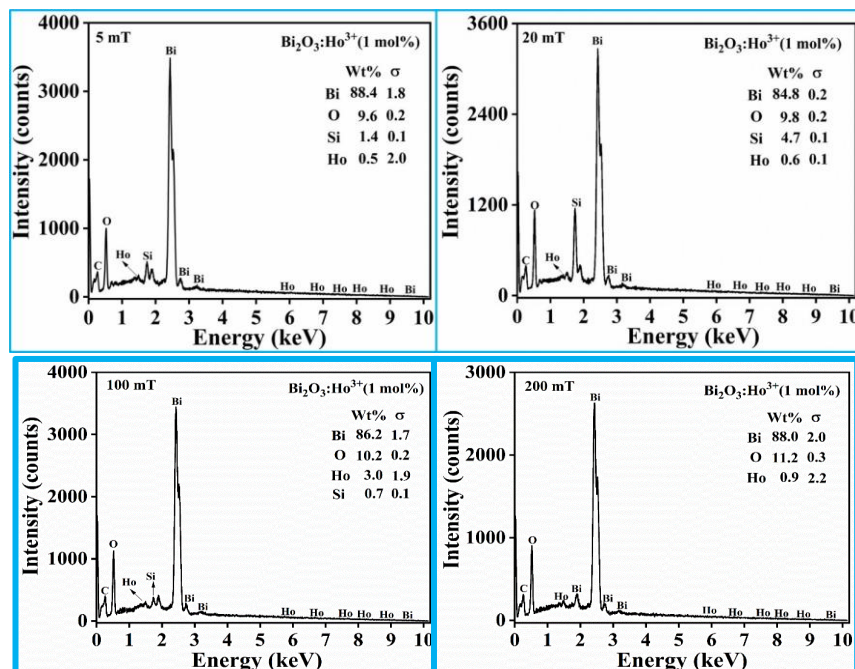

**Figure S4.** EDS of  $\text{Bi}_2\text{O}_3:\text{Ho}^{3+}$  (1 mol.%) deposited at different  $\text{O}_2$  partial pressure (5–200 mT) with  $T_s = 400^\circ\text{C}$ .

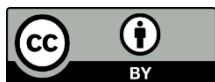

© 2020 by the authors. Licensee MDPI, Basel, Switzerland. This article is an open access article distributed under the terms and conditions of the Creative Commons Attribution (CC BY) license (<http://creativecommons.org/licenses/by/4.0/>).
